# Supplementary material for: Oxygen vacancies on nanosized ceria govern the NOxstorage capacity of NSR catalysts
Source: Royal Society of Chemistry journal article supplement (doi:10.1039/c5cy01660f), 2016-01-01
Supplement: c5cy01660f1.pdf [file c5cy01660f1.pdf]

1

## SUPPORTING INFORMATION

2 Oxygen vacancies on nanosized ceria govern  
3 the NO<sub>x</sub> storage capacity of NSR catalysts

4 *Yan Zhang*<sup>†</sup>; *Yunbo Yu*<sup>†</sup>; *Hong He*<sup>\*</sup>

5 State Key Joint Laboratory of Environment Simulation and Pollution Control,

6 Research Center for Eco-Environmental Sciences, Chinese Academy of Sciences,

7 Beijing, 100085, China

### 8 Corresponding Author

9 Hong He<sup>\*</sup> E-mail: honghe@rcees.ac.cn

10

11

## 1 1. Experimental.

2 **Methanol adsorption:** The Pt/BaO/CeO<sub>2</sub> samples were pretreated in the DRIFTS  
3 cell in flowing 10% H<sub>2</sub>/He (25 mL/min) at 450 °C for 1h and then cooled to room  
4 temperature before switching to He. During the process, the reduced samples do not  
5 expose to the oxygen. Methanol (Sigma-Aldrich, >99.9%) was bubbled with 25  
6 mL/min He at room temperature, which was fed to the in situ DRIFTS cell. Then,  
7 IR measurement was carried out until the spectrum was stable.

8

1 **2. Results.**

2 **2.1 TEM and HRTEM images of NSR catalysts.**

3

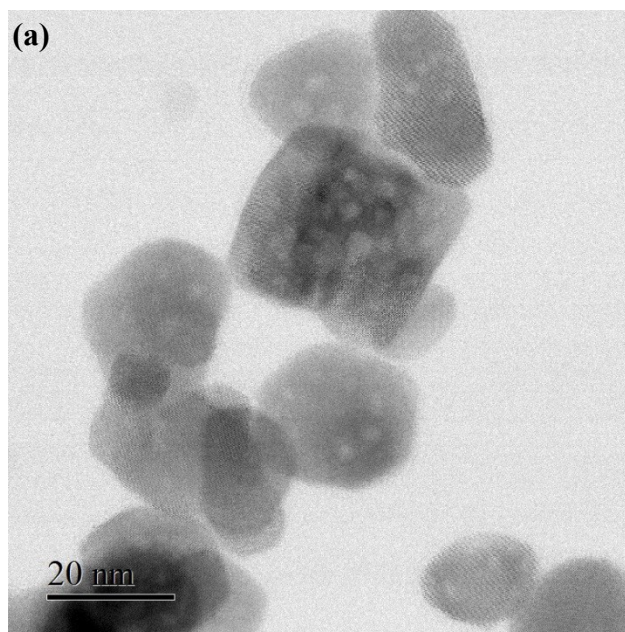

4

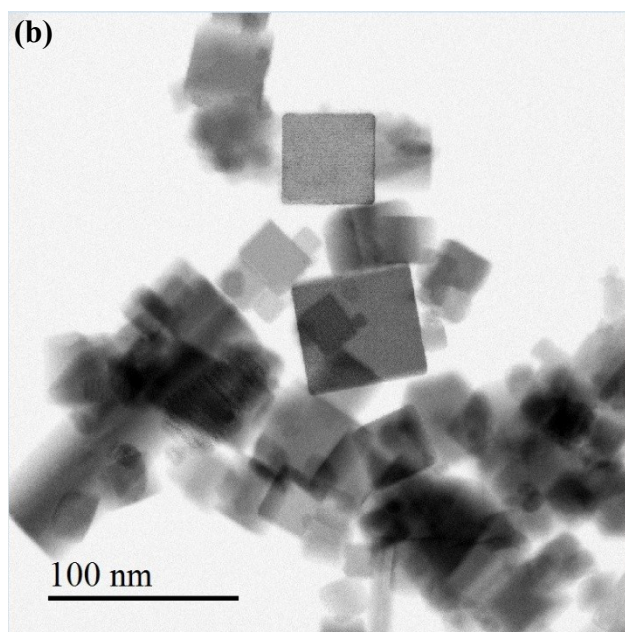

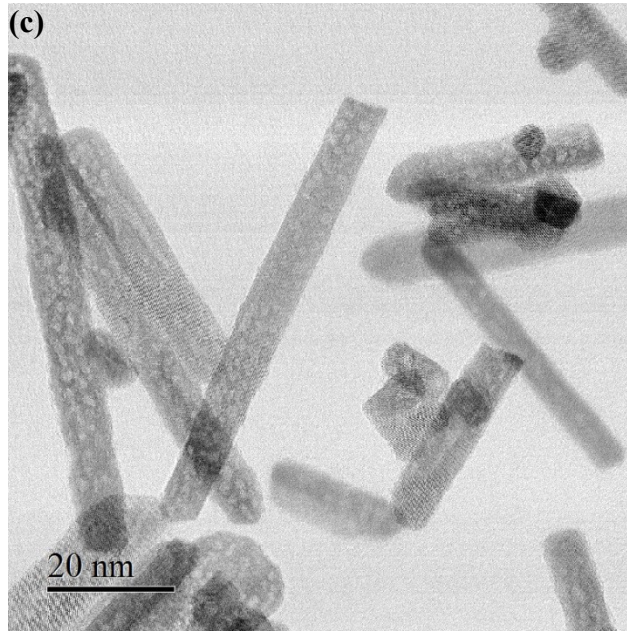

1

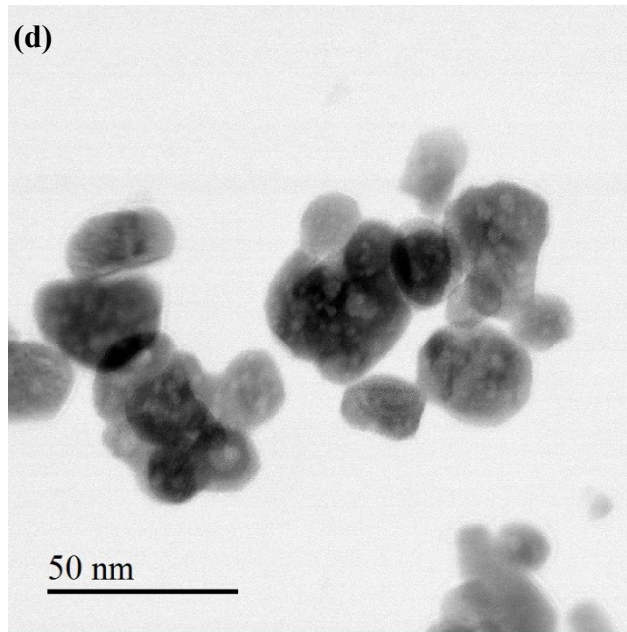

2

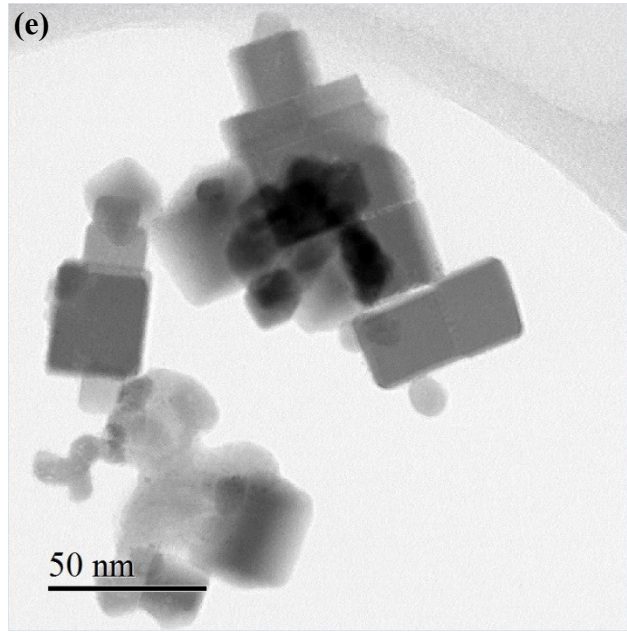

1

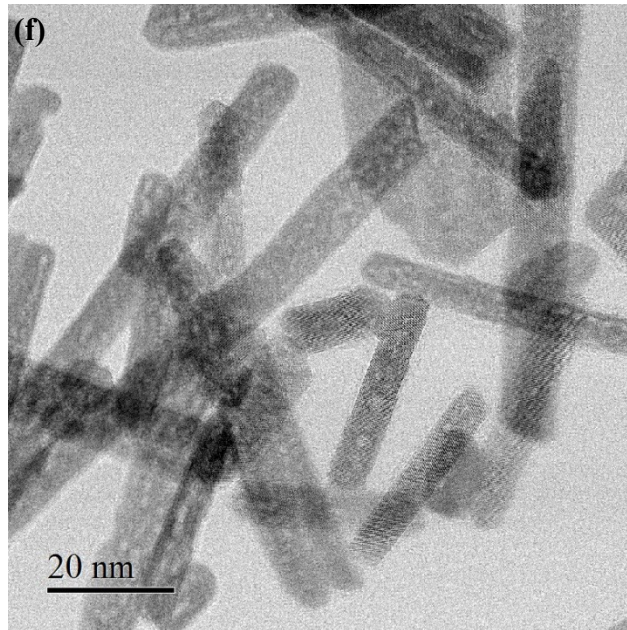

2

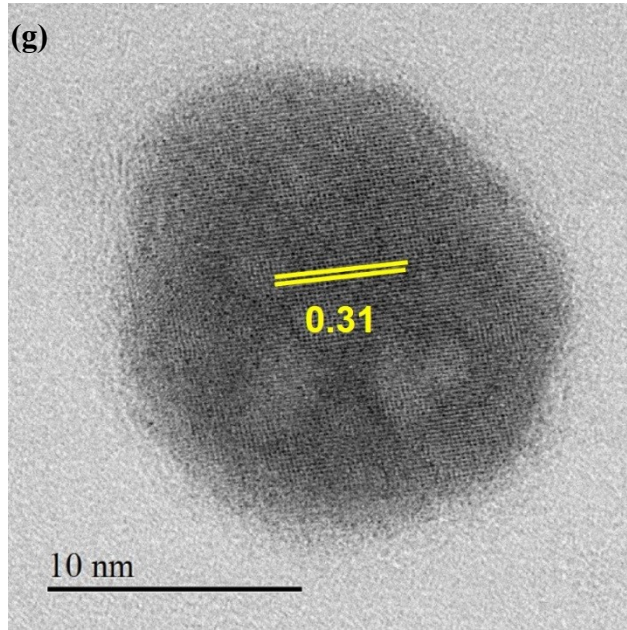

1

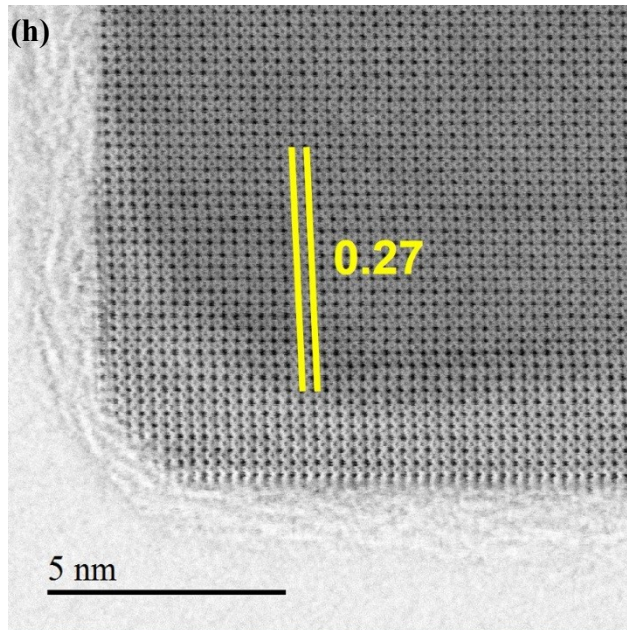

2

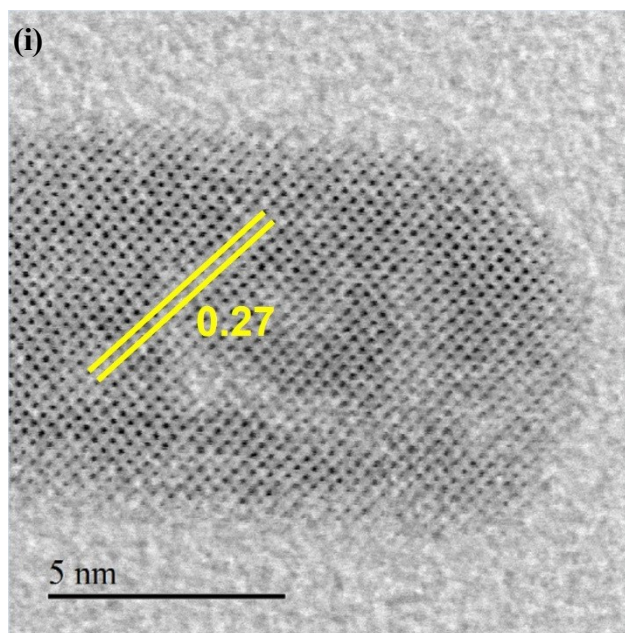

1

2 **Figure S1.** TEM and HRTEM images of CeO<sub>2</sub>-NP (a), CeO<sub>2</sub>-NC (b), CeO<sub>2</sub>-NR (c),

3 and Pt/BaO/CeO<sub>2</sub>-NP (d and g), Pt/BaO/CeO<sub>2</sub>-NC (e and h), Pt/BaO/CeO<sub>2</sub>-NR (f and

4 i).

5

1 2.2 NSC measurements and theoretical  $\text{NO}_x$  storage capacity.

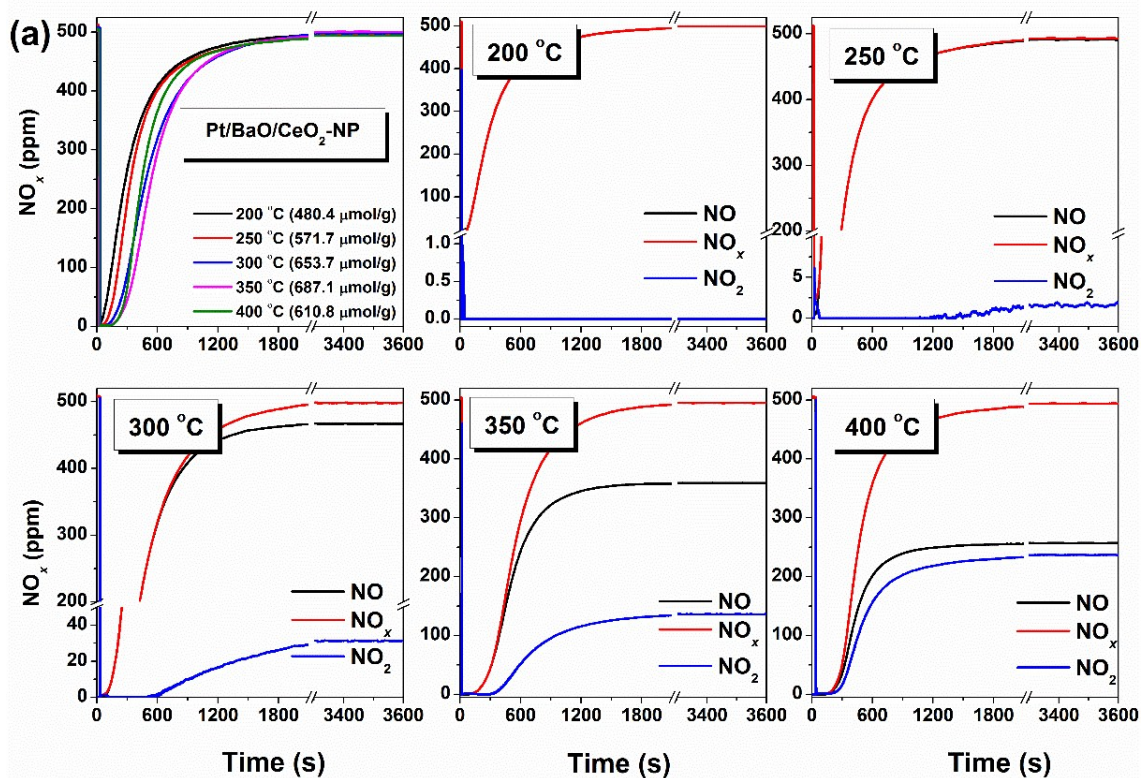

2

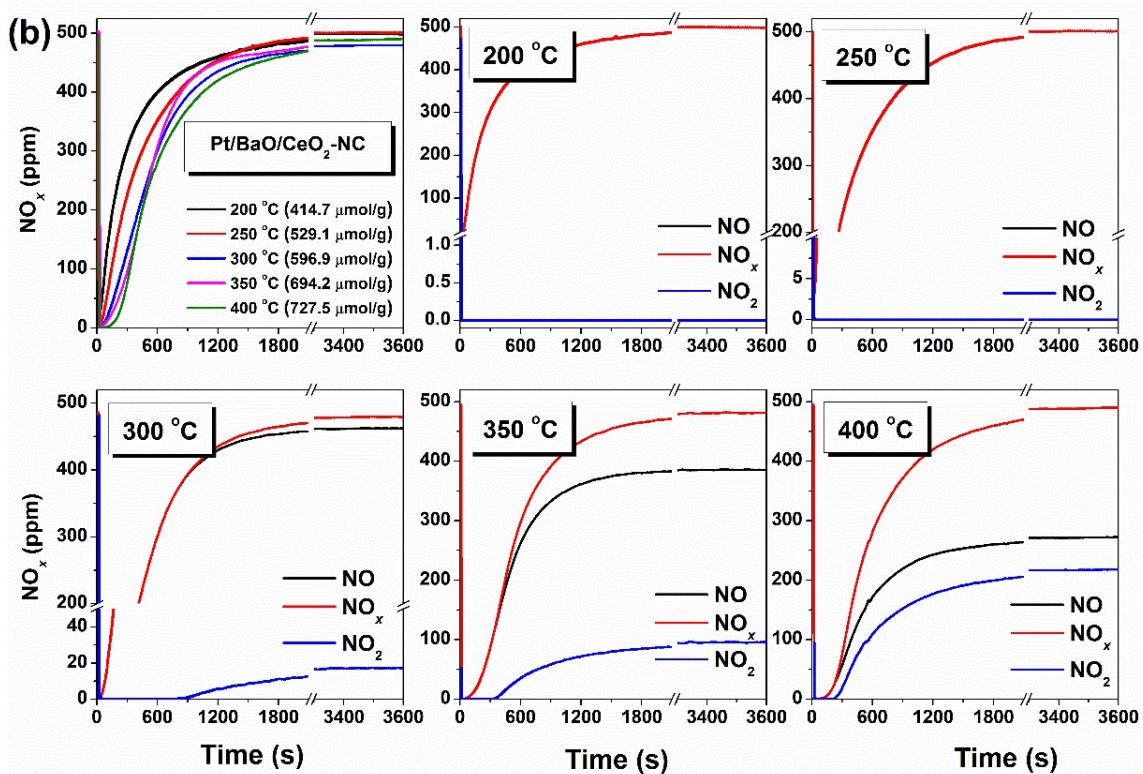

3



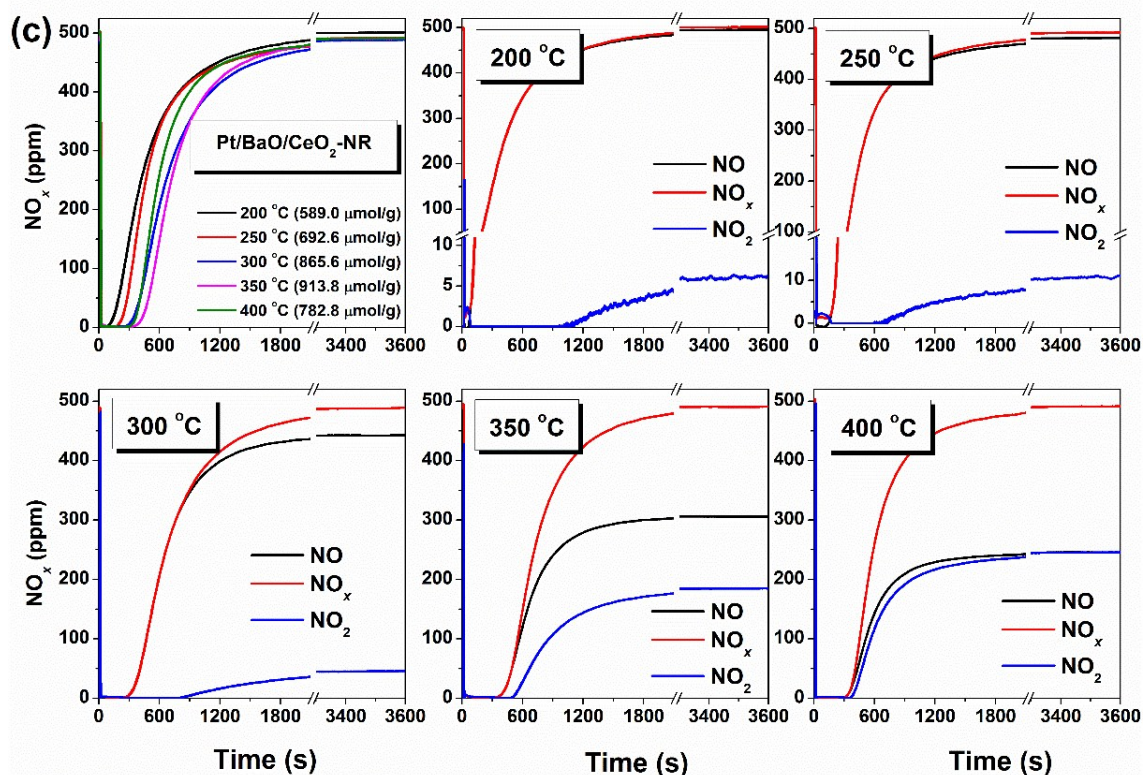

1

2 **Figure S2.** Evolutions of NO, NO<sub>2</sub> and NO<sub>x</sub> as a function of time and temperature

3 under lean condition over Pt/BaO/CeO<sub>2</sub>-NP (a), Pt/BaO/CeO<sub>2</sub>-NC (b), and

4 Pt/BaO/CeO<sub>2</sub>-NR (c).

5

6 **Theoretical NO<sub>x</sub> storage capacity.** We also measured the NO<sub>x</sub> storage capacity on the  
 7 Ba-free samples. Taking Pt/CeO<sub>2</sub>-NR as an example (Figure S4), the maximum NSC  
 8 value of 93.2 μmol/g-cat was obtained at 350 °C, which is 10% of the NSC value of  
 9 Pt/BaO/CeO<sub>2</sub>-NR at the same temperature. At whole temperature range, the NO<sub>x</sub>  
 10 storage capacity of Pt/CeO<sub>2</sub>-NR is much lower than that Ba-containing one  
 11 (Pt/BaO/CeO<sub>2</sub>-NR). As a result, the theoretical NSC is calculated in accordance with  
 12 the actual amount of BaO obtained from ICP-OES, considering all the NO<sub>x</sub> stored on  
 13 the BaO sites.

14

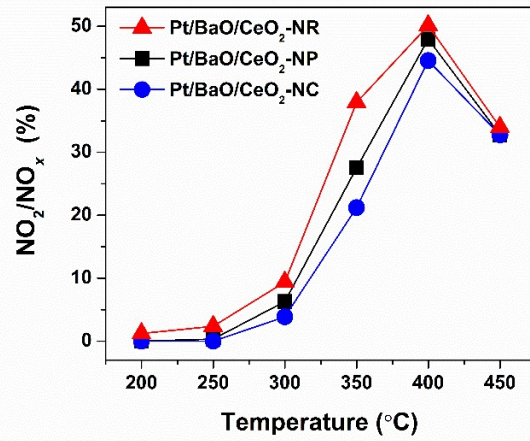

1

2 **Figure S3.** The outlet NO<sub>2</sub>/(NO+NO<sub>2</sub>) ratio at the end of 3600 s for NO<sub>x</sub> adsorption

3 over Pt/BaO/CeO<sub>2</sub>-NP, Pt/BaO/CeO<sub>2</sub>-NC, and Pt/BaO/CeO<sub>2</sub>-NR.

4

5

6

1 2.3 The effect of CO<sub>2</sub> and H<sub>2</sub>O on the catalytic performance and NH<sub>3</sub> selectivity.

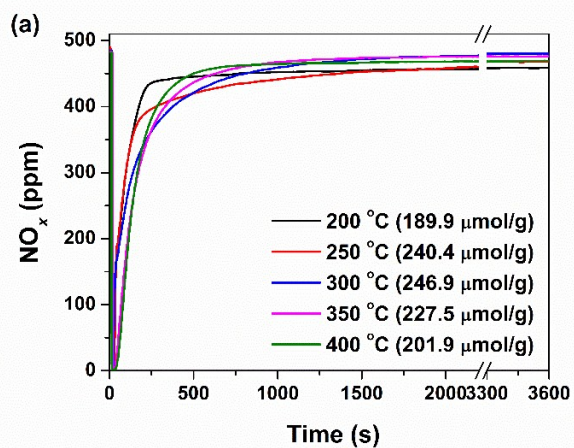

2

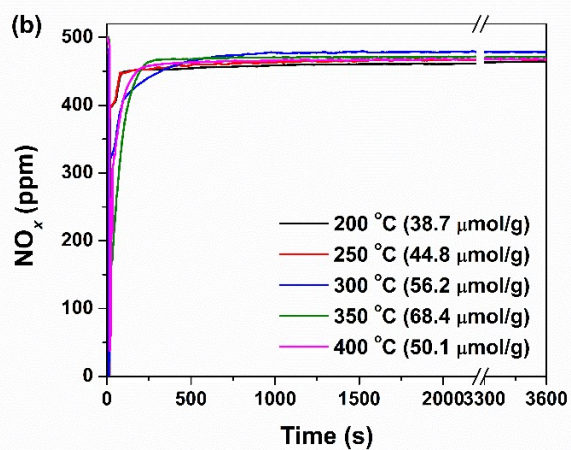

3

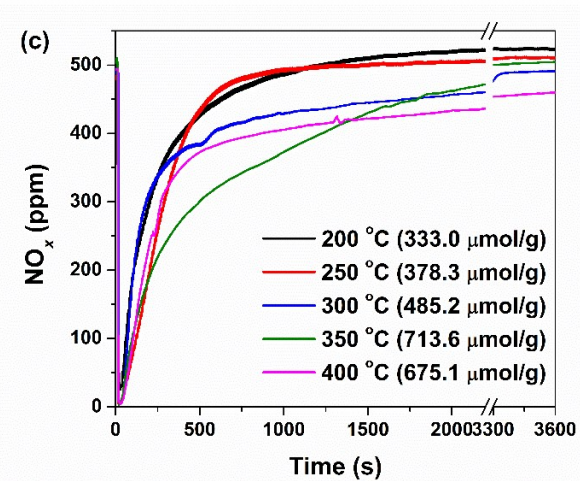

4

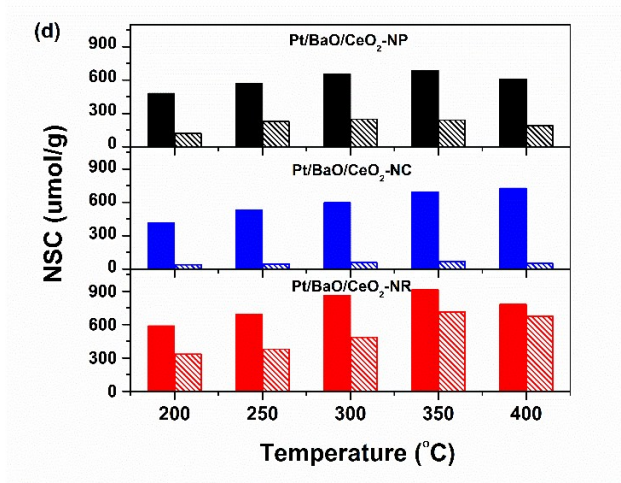

1

2 **Figure S4.** Evolutions of NO<sub>x</sub> as a function of time and temperature under lean

3 conditions over Pt/BaO/CeO<sub>2</sub>-NP (a), Pt/BaO/CeO<sub>2</sub>-NC (b), and Pt/BaO/CeO<sub>2</sub>-NR (c);

4 NO<sub>x</sub> storage capacities (NSC) tested at different temperatures over Pt/BaO/CeO<sub>2</sub>

5 catalysts without CO<sub>2</sub> and H<sub>2</sub>O (solid), or with 1% CO<sub>2</sub>, 2% H<sub>2</sub>O (hatchfaces) (d).

6

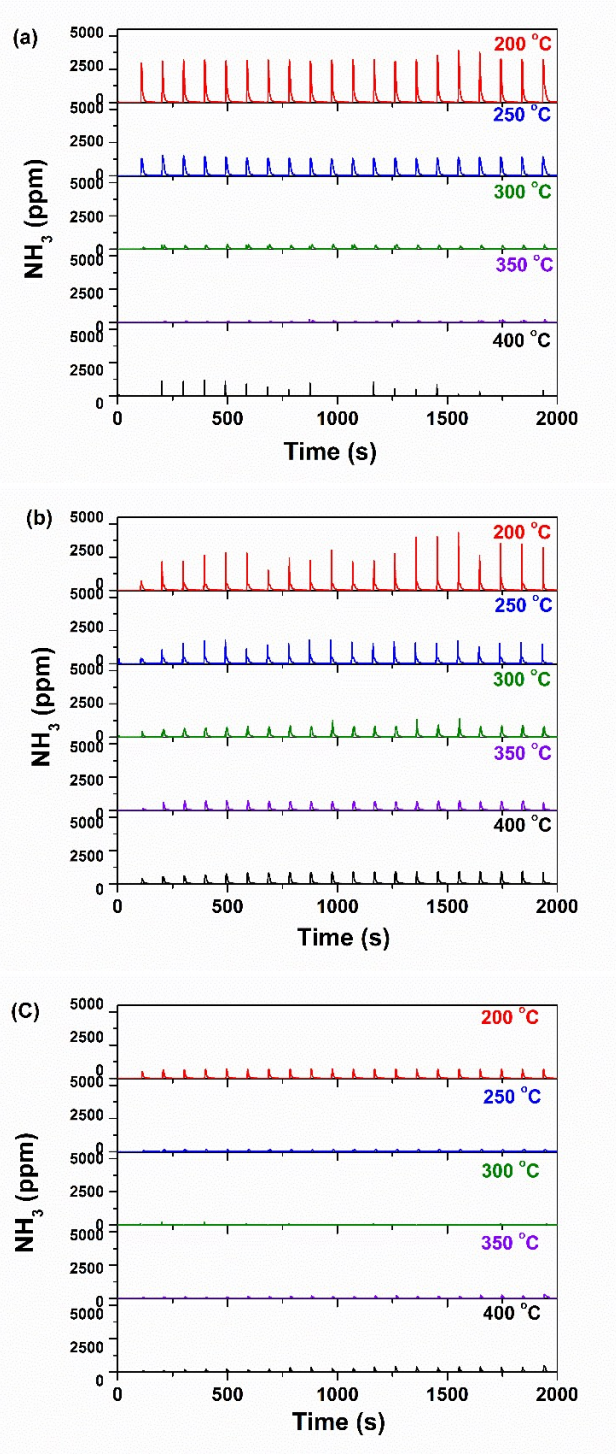

1

2

3

4 **Figure S5.** Evolutions of NH<sub>3</sub> concentrations under cyclic lean-rich conditions at  
 5 different temperatures on Pt/BaO/CeO<sub>2</sub>-NP (a), Pt/BaO/CeO<sub>2</sub>-NC (b), and  
 6 Pt/BaO/CeO<sub>2</sub>-NR (c).

7

8

1 **Table S1** NH<sub>3</sub> selectivity of all NSR catalysts under lean-rich conditions at different  
 2 temperatures.

| Samples                     | NH <sub>3</sub> selectivity (%) |        |        |        |        |
|-----------------------------|---------------------------------|--------|--------|--------|--------|
|                             | 200 °C                          | 250 °C | 300 °C | 350 °C | 400 °C |
| Pt/BaO/CeO <sub>2</sub> -NP | 52.83                           | 35.54  | 10.07  | 5.24   | 0.88   |
| Pt/BaO/CeO <sub>2</sub> -NC | 58.70                           | 46.52  | 41.43  | 33.97  | 37.41  |
| Pt/BaO/CeO <sub>2</sub> -NR | 11.54                           | 4.39   | 0.74   | 4.07   | 5.37   |

3

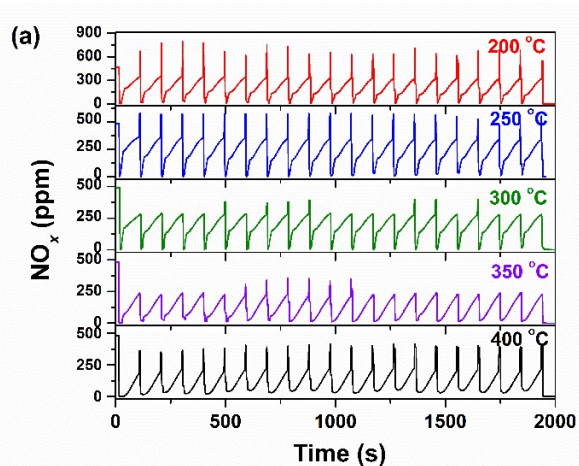

4

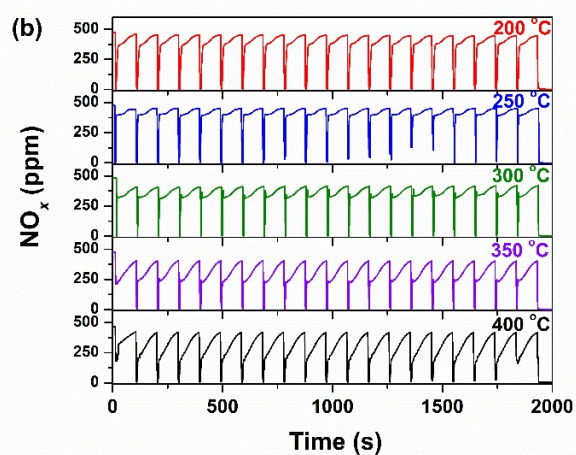

5

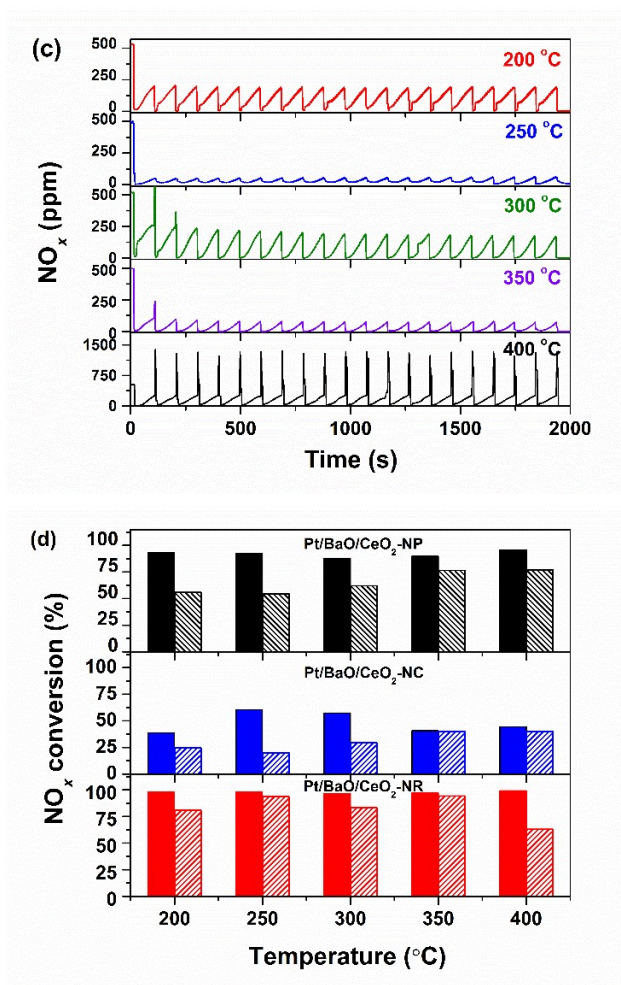

1

2

3 **Figure S6.** Evolutions of NO<sub>x</sub> concentrations under cyclic lean-rich conditions at  
 4 different temperatures on Pt/BaO/CeO<sub>2</sub>-NP (a), Pt/BaO/CeO<sub>2</sub>-NC (b), and

5 Pt/BaO/CeO<sub>2</sub>-NR (c); average NO<sub>x</sub> conversion over all NSR catalysts under cyclic

6 lean-rich conditions at different temperatures without CO<sub>2</sub> and H<sub>2</sub>O (solid), or with 1%

7 CO<sub>2</sub>, 2% H<sub>2</sub>O (hatchfaces) (d).

1 2.4 Pt XPS, Pt-L<sub>III</sub> EXAFS spectra, and Ce XPS.

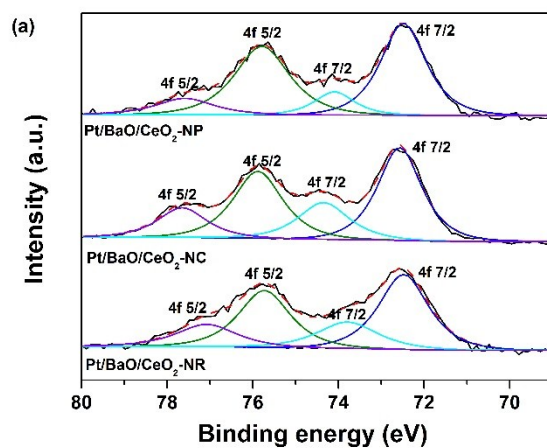

2

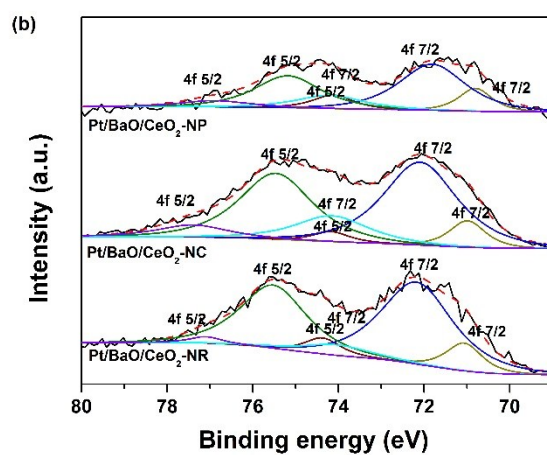

3

4 **Figure S7.** Pt 3d XPS spectra of Pt/BaO/CeO<sub>2</sub> (a), and the NSR catalysts reduced by

5

3 % H<sub>2</sub> (Pt/BaO/CeO<sub>2</sub>-R) (b).

6



1 **Table S2.** XPS binding energies of individual peaks of the Pt 4f spectra for NSR  
 2 catalysts and corresponding H<sub>2</sub>-treated catalysts.

| Samples                       | Pt 4f <sub>7/2</sub> | Pt 4f <sub>5/2</sub> | Pt 4f <sub>7/2</sub> | Pt 4f <sub>5/2</sub> | Pt 4f <sub>7/2</sub> | Pt 4f <sub>5/2</sub> |
|-------------------------------|----------------------|----------------------|----------------------|----------------------|----------------------|----------------------|
| Pt/BaO/CeO <sub>2</sub> -NP   | 72.5                 | 75.8                 | 74.1                 | 77.6                 | -                    | -                    |
| Pt/BaO/CeO <sub>2</sub> -NP-R | 71.8                 | 75.2                 | 74.2                 | 77.0                 | 70.8                 | 74.1                 |
| Pt/BaO/CeO <sub>2</sub> -NC   | 72.5                 | 75.8                 | 74.3                 | 77.6                 | -                    | -                    |
| Pt/BaO/CeO <sub>2</sub> -NC-R | 72.1                 | 75.5                 | 74.2                 | 77.4                 | 70.9                 | 74.1                 |
| Pt/BaO/CeO <sub>2</sub> -NR   | 72.4                 | 75.7                 | 73.8                 | 77.1                 | -                    | -                    |
| Pt/BaO/CeO <sub>2</sub> -NR-R | 72.2                 | 75.5                 | 74.0                 | 77.1                 | 71.0                 | 74.3                 |

3

4

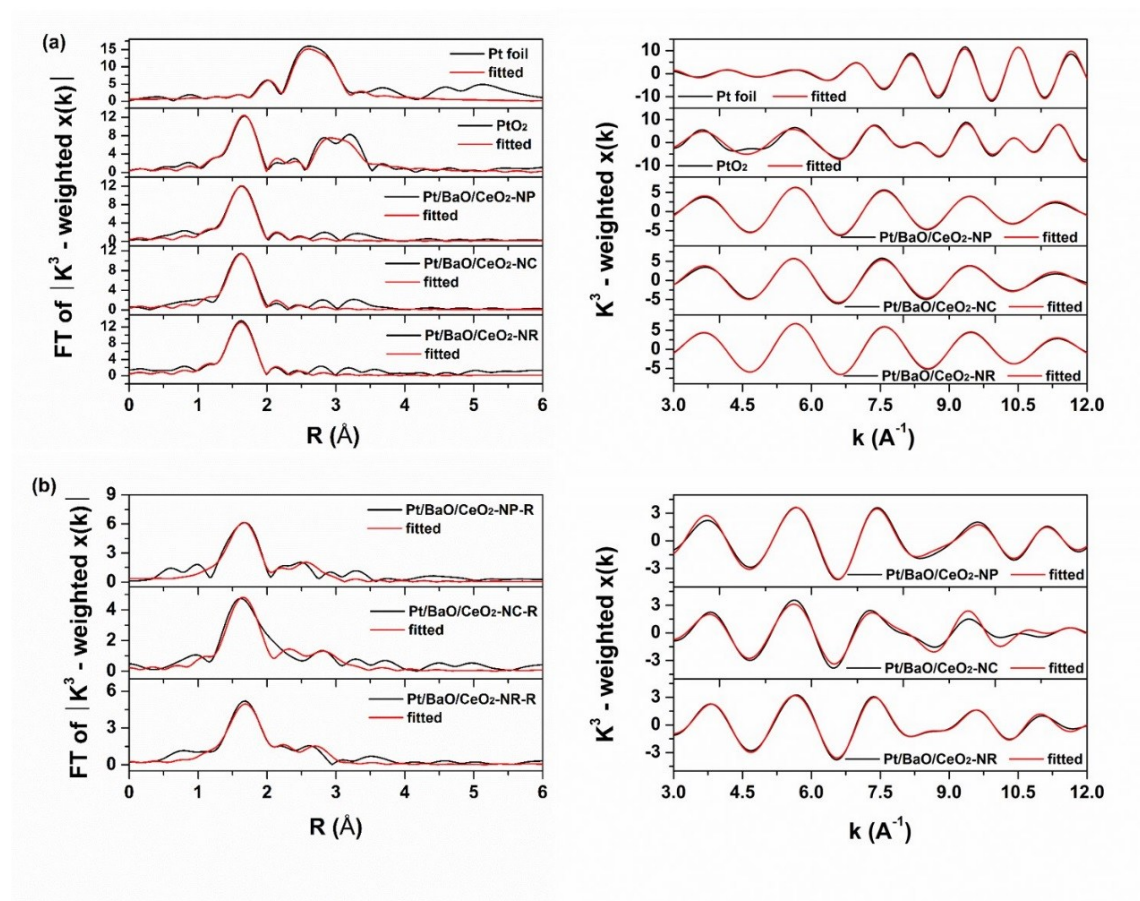

1

2 **Figure S8.** Pt-L<sub>III</sub> EXAFS results of Fourier transformation of filtered  $k^3 \cdot \chi(k)$ ; and

3 filtered  $k^3 \cdot \chi(k)$  in the  $k$  range of 3-12  $\text{\AA}^{-1}$ . (a) samples before  $H_2$  reduction; (b)

4 samples exposed to air after  $H_2$  reduction.

5

1 **Table S3.** Fitting parameters of the curve fitted  $k^3$ -weighted EXAFS analysis of all  
 2 samples<sup>[a]</sup>.

| <b>Samples</b>                                        | <b>Shell</b> | <b>CN</b> | <b>R/Å<br/>(±0.001)</b> | <b>DW/Å</b> | <b>R factor</b> |
|-------------------------------------------------------|--------------|-----------|-------------------------|-------------|-----------------|
| <b>Pt foil</b>                                        | Pt-Pt        | 12.0      | 2.77                    | 0.073       | 1.5             |
| <b>PtO<sub>2</sub></b>                                | Pt-O         | 6.0       | 2.02                    | 0.069       | 4.2             |
|                                                       | Pt-O-Pt      | 4.0       | 3.10                    | 0.048       |                 |
| <b>Pt/BaO/CeO<sub>2</sub>-NP</b>                      | Pt-O         | 5.7 ± 0.7 | 2.00                    | 0.065       | 0.37            |
| <b>Pt/BaO/CeO<sub>2</sub>-NC</b>                      | Pt-O         | 5.4 ± 0.7 | 2.00                    | 0.066       | 0.97            |
| <b>Pt/BaO/CeO<sub>2</sub>-NR</b>                      | Pt-O         | 5.9 ± 0.7 | 2.00                    | 0.062       | 0.12            |
| <b>Pt/BaO/CeO<sub>2</sub>-NP-<br/>R<sup>[b]</sup></b> | Pt-O         | 3.9 ± 0.3 | 2.01                    | 0.084       | 1.79            |
|                                                       | Pt-Pt        | 1.7 ± 0.3 | 2.67                    | 0.083       |                 |
| <b>Pt/BaO/CeO<sub>2</sub>-<br/>NC-R<sup>[b]</sup></b> | Pt-O         | 3.1 ± 0.3 | 2.02                    | 0.078       | 5.41            |
|                                                       | Pt-Pt        | 1.5 ± 0.4 | 2.78                    | 0.078       |                 |
| <b>Pt/BaO/CeO<sub>2</sub>-<br/>NR-R<sup>[b]</sup></b> | Pt-O         | 3.7 ± 0.4 | 2.02                    | 0.091       | 0.62            |
|                                                       | Pt-Pt        | 2.1 ± 0.5 | 2.67                    | 0.092       |                 |

3 <sup>[a]</sup> CN = coordination number, R = bond length, DW = Debye-Waller factor, Pt-Pt is  
 4 the coordination shell in Pt metal, Pt-O is the first coordination shell in PtO<sub>2</sub>, Pt-O-Pt  
 5 is the second coordination shell in PtO<sub>2</sub>.

6 <sup>[b]</sup> Samples exposed to ambient air after H<sub>2</sub> reduction at 450 °C for 60 min.

7

8

1 **Table S4.** XPS binding energies of individual peaks of the Ce 3d spectra for CeO<sub>2</sub> nanomaterials calcined at 550 °C and corresponding NSR catalysts.

| Sample                                       | Ce <sup>4+</sup> |                 |                 |       |                 | u <sup>'''</sup><br>(relative peak area/%) | Ce <sup>3+</sup> |                |
|----------------------------------------------|------------------|-----------------|-----------------|-------|-----------------|--------------------------------------------|------------------|----------------|
|                                              | v                | v <sup>''</sup> | v <sup>''</sup> | u     | u <sup>''</sup> |                                            | v <sup>'</sup>   | u <sup>'</sup> |
| CeO <sub>2</sub> -NP                         | 881.9            | 888.4           | 897.8           | 900.4 | 907.1           | 916.2<br>(14.8)                            | 884.6            | 903.0          |
| Pt/BaO/CeO <sub>2</sub> -NP                  | 881.9            | 888.5           | 897.8           | 900.5 | 907.1           | 916.2<br>(14.4)                            | 884.8            | 902.7          |
| Pt/BaO/CeO <sub>2</sub> -NP-R <sup>[b]</sup> | 882.0            | 888.6           | 897.9           | 900.5 | 907.2           | 916.3<br>(13.5)                            | 884.8            | 902.6          |
| CeO <sub>2</sub> -NC                         | 881.9            | 888.5           | 897.8           | 900.5 | 907.2           | 916.2<br>(15.1)                            | 884.5            | 902.3          |
| Pt/BaO/CeO <sub>2</sub> -NC                  | 881.9            | 888.5           | 897.8           | 900.5 | 907.1           | 916.2<br>(15.2)                            | 884.8            | 902.0          |
| Pt/BaO/CeO <sub>2</sub> -NC-R <sup>[b]</sup> | 882.0            | 888.6           | 897.8           | 900.4 | 907.0           | 916.2<br>(14.3)                            | 884.7            | 901.7          |
| CeO <sub>2</sub> -NR                         | 881.8            | 888.3           | 897.7           | 900.4 | 907.2           | 916.1<br>(14.7)                            | 884.3            | 903.0          |
| Pt/BaO/CeO <sub>2</sub> -NR                  | 882.0            | 888.6           | 897.9           | 900.5 | 907.2           | 916.3<br>(13.9)                            | 884.8            | 902.8          |
| Pt/BaO/CeO <sub>2</sub> -NR-R <sup>[b]</sup> | 881.6            | 888.2           | 897.5           | 900.2 | 906.9           | 915.9<br>(12.7)                            | 884.2            | 903.3          |

3 R<sup>[b]</sup>: the NSR catalysts reduced by 3% H<sub>2</sub>.

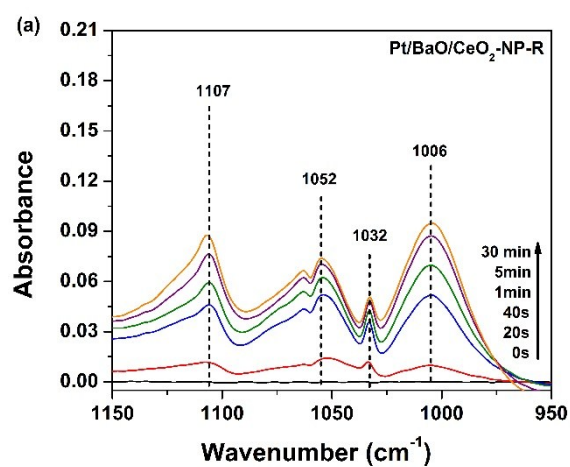

4

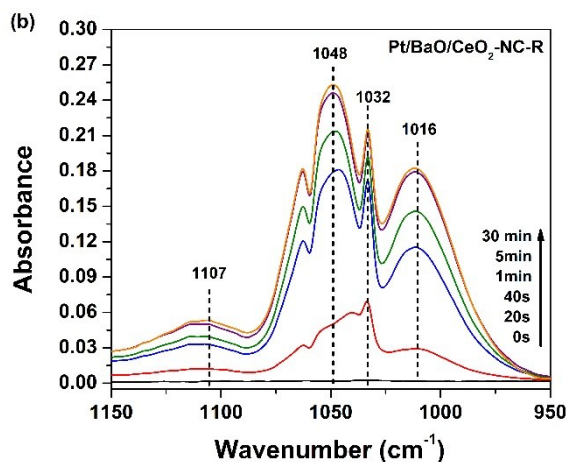

1

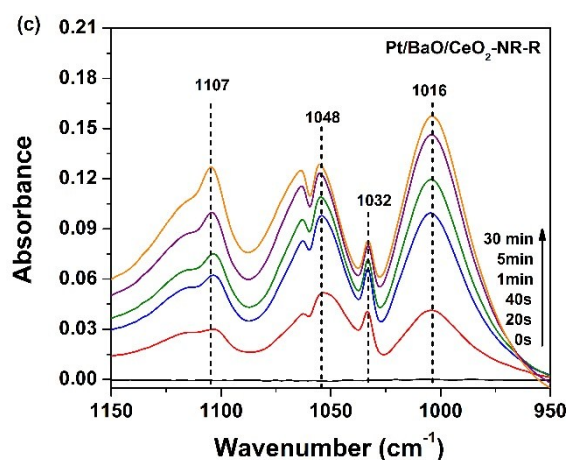

2

3 **Figure S9.** *in situ* DRIFTS spectra of adsorbed species in flowing methanol at room  
 4 temperature on Pt/BaO/CeO<sub>2</sub>-NP-R (a), Pt/BaO/CeO<sub>2</sub>-NC-R (b), and Pt/BaO/CeO<sub>2</sub>-  
 5 NR-R (c).

6 Before the measurement, the samples were pretreated by 10% H<sub>2</sub>/He (25 mL/min) at  
 7 450 °C for 1h, and then cooled to room temperature. Conditions: 16.6 % CH<sub>3</sub>OH, He  
 8 balance.

9 **Table S5.** The integral area of band at 970-1085 cm<sup>-1</sup> on the reduced NSR catalysts.

| Samples                    | Integral Area of 970-1085 cm <sup>-1</sup> (g <sup>-1</sup> ) |       |       |
|----------------------------|---------------------------------------------------------------|-------|-------|
|                            | NP                                                            | NC    | NR    |
| Pt/BaO/CeO <sub>2</sub> -R | 0.185                                                         | 0.104 | 0.240 |

## 1 2.5 Reducibility of NSR catalysts

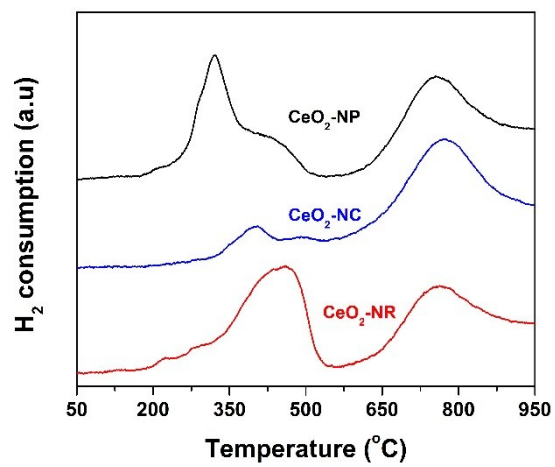

2

3

**Figure S10.** H<sub>2</sub>-TPR profiles of the different shaped CeO<sub>2</sub>.

4

1 **Table S6.** The ratios of different species estimated by the area of corresponding peak  
 2 during H<sub>2</sub>-TPR on Pt/BaO/CeO<sub>2</sub>-NP, Pt/BaO/CeO<sub>2</sub>-NC, and Pt/BaO/CeO<sub>2</sub>-NR.

| Samples                     | Total H <sub>2</sub> consumption (μmol) | Peak                                        | Peak max (°C) | Peak area | Peak area ratio (%) | H <sub>2</sub> consumption (μmol) |
|-----------------------------|-----------------------------------------|---------------------------------------------|---------------|-----------|---------------------|-----------------------------------|
| Pt/BaO/CeO <sub>2</sub> -NP | 110.8                                   | Platinum oxide                              | 213.1         | 0.53      | 13.7                | 31.8                              |
|                             |                                         | Promoted surface CeO <sub>2</sub>           | 226.9         | 0.50      | 13.0                |                                   |
|                             |                                         | Surface CeO <sub>2</sub>                    | 598.1         | 0.61      | 15.7                |                                   |
|                             |                                         | Total surface CeO <sub>2</sub> <sup>a</sup> | –             | 1.11      | 28.7                |                                   |
|                             |                                         | Bulk CeO <sub>2</sub>                       | 747.3         | 2.23      | 57.6                |                                   |
| Pt/BaO/CeO <sub>2</sub> -NC | 123.6                                   | Platinum oxide                              | 201.0         | 0.34      | 8.2                 | 18.3                              |
|                             |                                         | Promoted surface CeO <sub>2</sub>           | 225.4         | 0.14      | 3.3                 |                                   |
|                             |                                         | Surface CeO <sub>2</sub>                    | 556.5         | 0.47      | 11.5                |                                   |
|                             |                                         | Total surface CeO <sub>2</sub> <sup>a</sup> | –             | 0.61      | 14.8                |                                   |
|                             |                                         | Bulk CeO <sub>2</sub>                       | 760.3         | 3.17      | 77.0                |                                   |
| Pt/BaO/CeO <sub>2</sub> -NR | 158.8                                   | Platinum oxide                              | 137.2         | 1.08      | 20.0                | 67.6                              |
|                             |                                         | Promoted surface CeO <sub>2</sub>           | 182.3         | 0.78      | 14.5                |                                   |
|                             |                                         | Surface CeO <sub>2</sub>                    | 553.7         | 1.52      | 28.1                |                                   |
|                             |                                         | Total surface CeO <sub>2</sub> <sup>a</sup> | –             | 2.30      | 42.6                |                                   |
|                             |                                         | Bulk CeO <sub>2</sub>                       | 746.9         | 2.03      | 37.4                |                                   |

3 <sup>a</sup> the total amounts of H<sub>2</sub> consumption related to promoted surface CeO<sub>2</sub> and surface  
 4 CeO<sub>2</sub> far away from Pt.

5

## 1 2.6 Relationship between properties of the catalysts and catalytic performance

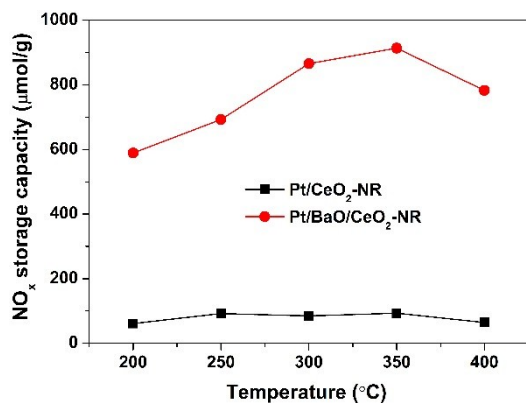

2

3 **Figure S11.** NO<sub>x</sub> storage capacities (NSC) tested at different temperatures for

4

Pt/CeO<sub>2</sub>-NR, and Pt/BaO/CeO<sub>2</sub>-NR.

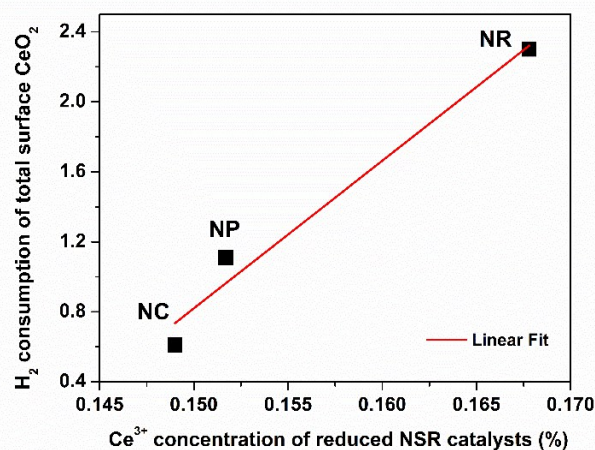

5

6 **Figure S12.** The relationship between the Ce<sup>3+</sup> concentration on reduced NSR

7

catalysts and the H<sub>2</sub> consumption of total surface CeO<sub>2</sub>.

8

9

10
